# Supplementary material for: Prognostic role of hERG1 Potassium Channels in Neuroendocrine Tumours of the Ileum and Pancreas
Source: MDPI journal article supplement (doi:10.3390/ijms231810623), 2022-09-13
Supplement: s1 [file s1]

## Supplementary Materials

### **Prognostic role of hERG1 potassium channels in neuroendocrine tumours of the ileum and pancreas.**

Jessica Iorio<sup>1@</sup>, Lorenzo Antonuzzo<sup>1,2@</sup>, Emanuela Scarpi<sup>3</sup>, Massimo D'Amico<sup>4</sup>, Claudia Duranti<sup>1</sup>, Luca Messerini<sup>1</sup>, Clotilde Sparano<sup>5</sup>, Damiano Caputo<sup>6,7</sup>, Daniele Lavacchi<sup>1,2</sup>, Domenico Borzomati<sup>6,7</sup>, Alice Antonelli<sup>1,2</sup>, Lorenzo Nibid<sup>7,8</sup>, Giuseppe Perrone<sup>7,8</sup>, Alessandro Coppola<sup>6,7</sup>, Roberto Coppola<sup>6,7</sup>, Francesco di Costanzo<sup>2</sup>, Elena Lastraioli<sup>1,9\*</sup>, Annarosa Arcangeli<sup>1,9</sup>

<sup>1</sup>Department of Experimental and Clinical Medicine, University of Florence, Florence Italy

<sup>2</sup>Medical Oncology, Azienda Ospedaliero-Universitaria Careggi, Florence, Italy

<sup>3</sup>Unit of Biostatistics and Clinical Trials, IRCCS Istituto Romagnolo per lo Studio dei tumori (IRST) "Dino Amadori", Meldola (FC), Italy

<sup>4</sup>DI.V.A.L. Toscana Srl, Sesto Fiorentino (Florence), Italy

<sup>5</sup>Endocrinology Unit, Department of Experimental and Clinical Biomedical Sciences "Mario Serio", University of Florence, Florence Italy

<sup>6</sup>General Surgery, Campus Bio-Medico University, Rome, Italy

<sup>7</sup>Fondazione Policlinico Universitario Campus Bio-Medico, Rome, Italy

<sup>8</sup>Pathology Unit, Campus Bio-Medico University, Rome, Italy

<sup>9</sup>Complex Dynamics Study Centre (CSDC), University of Florence, Florence Italy

@Equally contributed

\*Correspondence: [elena.lastraioli@unifi.it](mailto:elena.lastraioli@unifi.it); +39 0552751319

*Figure S1. Kaplan-Meier plots of OS in ileal NET patients according to gender and age.*

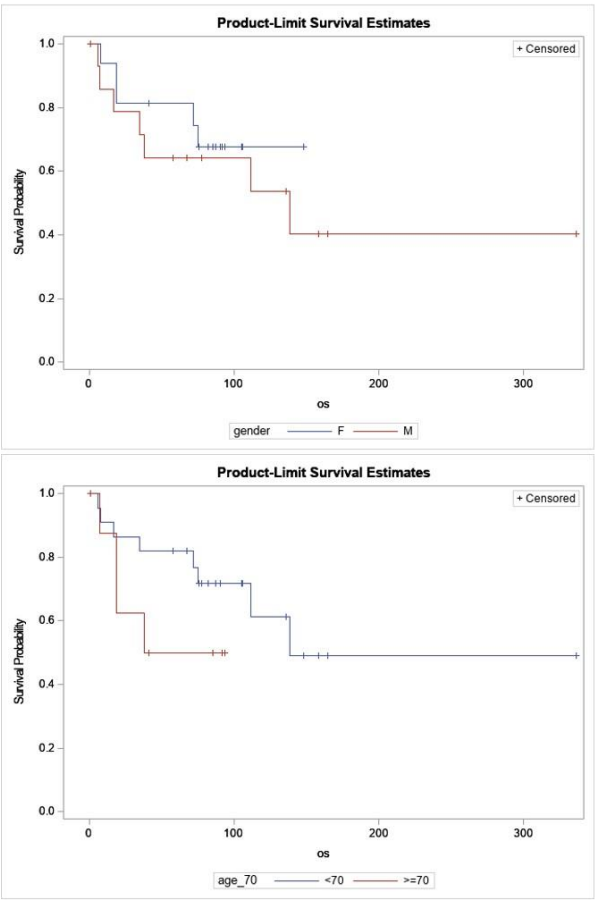

The SAS System

| Obs | age_70 | gender | os     | dec |
|-----|--------|--------|--------|-----|
| 1   | <70    | F      | 7.86   | 1   |
| 2   | <70    | F      | 71.97  | 1   |
| 3   | <70    | F      | 75.10  | 1   |
| 4   | <70    | F      | 75.53  | 0   |
| 5   | <70    | F      | 81.97  | 0   |
| 6   | <70    | F      | 87.11  | 0   |
| 7   | <70    | F      | 90.26  | 0   |
| 8   | <70    | F      | 105.16 | 0   |
| 9   | <70    | F      | 105.46 | 0   |
| 10  | <70    | F      | 148.03 | 0   |
| 11  | <70    | M      | 5.92   | 1   |
| 12  | <70    | M      | 16.94  | 1   |
| 13  | <70    | M      | 34.44  | 1   |
| 14  | <70    | M      | 57.96  | 0   |
| 15  | <70    | M      | 67.04  | 0   |
| 16  | <70    | M      | 77.80  | 0   |
| 17  | <70    | M      | 111.25 | 1   |
| 18  | <70    | M      | 135.72 | 0   |
| 19  | <70    | M      | 138.36 | 1   |
| 20  | <70    | M      | 157.99 | 0   |
| 21  | <70    | M      | 164.47 | 0   |
| 22  | <70    | M      | 336.35 | 0   |
| 23  | >=70   | F      | 18.36  | 1   |
| 24  | >=70   | F      | 18.49  | 1   |
| 25  | >=70   | F      | 41.15  | 0   |
| 26  | >=70   | F      | 65.16  | 0   |
| 27  | >=70   | F      | 91.68  | 0   |
| 28  | >=70   | F      | 93.55  | 0   |
| 29  | >=70   | M      | 0.63   | 0   |
| 30  | >=70   | M      | 6.91   | 1   |
| 31  | >=70   | M      | 37.86  | 1   |

**Table S1.** Percentage of *h*ERG1 positive tumour cells in relation to baseline characteristics in ileal NET patients.

|                                  | % <i>h</i> ERG1 positive tumor cells |       |
|----------------------------------|--------------------------------------|-------|
|                                  | Median value (range)                 | p     |
| <b>Overall</b>                   | 80 (0-100)                           |       |
| <b>Age</b>                       |                                      |       |
| <70                              | 80 (0-100)                           |       |
| ≥70                              | 90 (0-100)                           | 0.420 |
| <b>Gender</b>                    |                                      |       |
| Female                           | 80 (0-100)                           |       |
| Male                             | 90 (0-100)                           | 0.496 |
| <b>TNM at diagnosis</b>          |                                      |       |
| II                               | 45 (0-100)                           |       |
| III                              | 90 (0-100)                           |       |
| IV                               | 80 (0-100)                           | 0.289 |
| <b>Metastases at diagnosis</b>   |                                      |       |
| No                               | 90 (0-100)                           |       |
| Yes                              | 80 (0-100)                           | 0.233 |
| <b>Radical Surgery</b>           |                                      |       |
| No                               | 80 (0-100)                           |       |
| Yes                              | 85 (0-100)                           | 0.549 |
| <b>Ki67 (%)</b>                  |                                      |       |
| <3                               | 80 (0-100)                           |       |
| 3-20                             | 90 (0-100)                           |       |
| >20                              | 0 (0-0)                              | 0.210 |
| <b>SSA Receptors<sup>1</sup></b> |                                      |       |
| No                               | 90 (0-100)                           |       |
| Yes                              | 80 (0-100)                           | 0.509 |
| <b>PET-FDG<sup>2</sup></b>       |                                      |       |
| No                               | 80 (0-100)                           |       |
| Yes                              | 90 (0-100)                           | 0.306 |
| <b>Grading</b>                   |                                      |       |
| G1                               | 80 (0-100)                           |       |
| G2                               | 90 (0-100)                           |       |
| G3                               | 0 (0-0)                              | 0.210 |

<sup>1</sup> SSA Receptors: somatostatin analogs receptors.

<sup>2</sup> PET-FDG: fluorodeoxyglucose (FDG)-positron emission tomography (PET).

**Table S2.** Univariate analysis of Overall Survival in TNM stage IV iNET. Statistically significant values are reported in bold. nr: not reached

|                                  | N. patients | N. deaths | Median OS <sup>3</sup><br>(months)<br>(95% CI <sup>4</sup> ) | HR <sup>5</sup><br>(95% CI) | P            |
|----------------------------------|-------------|-----------|--------------------------------------------------------------|-----------------------------|--------------|
| <b>Overall</b>                   | 15          | 7         | nr                                                           | -                           | -            |
| <b>Age</b> (continuous variable) | 15          | 7         | -                                                            | 1.017 (0.957-1.080)         | 0.592        |
| <70                              | 12          | 6         | nr                                                           | 1.00                        |              |
| ≥70                              | 3           | 1         | nr                                                           | 0.72 (0.08-6.05)            | 0.761        |
| <b>Gender</b>                    |             |           |                                                              |                             |              |
| Female                           | 11          | 4         | nr                                                           | 1.00                        |              |
| Male                             | 4           | 3         | 26 (6-nr)                                                    | 3.40 (0.74-15.56)           | 0.114        |
| <b>Metastases at diagnosis</b>   |             |           |                                                              |                             |              |
| No                               | 0           | -         | -                                                            | 1.00                        |              |
| Yes                              | 15          | 7         | nr                                                           | -                           | -            |
| <b>Radical Surgery</b>           |             |           |                                                              |                             |              |
| No                               | 12          | 6         | 75 (8-nr)                                                    | 1.00                        |              |
| Yes                              | 3           | 1         | nr                                                           | 0.63 (0.07-5.23)            | 0.667        |
| <b>Ki67 (%)</b>                  |             |           |                                                              |                             |              |
| <3                               | 4           | 1         | nr                                                           | 1.00                        |              |
| 3-20                             | 9           | 4         | nr                                                           | 2.40 (0.27-21.58)           |              |
| >20                              | 2           | 2         | 21 (8-nr)                                                    | 11.08 (0.87-141.59)         | 0.137        |
| <b>SSA Receptors<sup>6</sup></b> |             |           |                                                              |                             |              |
| No                               | 3           | 2         | 18 (8-nr)                                                    | 1.00                        |              |
| Yes                              | 12          | 5         | nr                                                           | 0.44 (0.08-2.31)            | 0.332        |
| <b>PET-FDG<sup>7</sup></b>       |             |           |                                                              |                             |              |
| No                               | 10          | 5         | nr                                                           | 1.00                        |              |
| Yes                              | 3           | 1         | nr                                                           | 0.85 (0.10-7.30)            | 0.881        |
| <b>% hERG1 positive cells</b>    |             |           |                                                              |                             |              |
| Negative (<40)                   | 5           | 5         | 34 (6-nr)                                                    | 1.00                        |              |
| Positive (≥40)                   | 10          | 2         | nr                                                           | 0.12 (0.02-0.65)            | <b>0.013</b> |

<sup>3</sup> OS: Overall Survival.

<sup>4</sup> HR: Hazard Ratio.

<sup>5</sup> CI: Confidence Interval

<sup>6</sup> SSA Receptors: somatostatin analogs receptors.

<sup>7</sup> PET-FDG: fluorodeoxyglucose (FDG)-positron emission tomography (PET).

**Table S3.** Univariate analysis of Progression Free Survival in TNM I-III ileal NET patients. Statistically significant values are reported in bold.

|                                   | N. pts | N. events | % 5-years PFS <sup>8</sup><br>(95% CI <sup>9</sup> ) | P (logrank)  | HR <sup>10</sup><br>(95% CI) | P (Cox) |
|-----------------------------------|--------|-----------|------------------------------------------------------|--------------|------------------------------|---------|
| <b>Overall</b>                    | 16     | 10        | 30 (6-54)                                            |              | -                            | -       |
| <b>Age</b> (continuous variable)  | 16     | 10        | -                                                    | -            | 0.975 (0.928-1.024)          | 0.312   |
| <70                               | 10     | 7         | 30 (2-58)                                            |              | 1.00                         |         |
| ≥70                               | 6      | 3         | 27 (0-71)                                            | 0.605        | 0.70 (0.18-2.72)             | 0.607   |
| <b>Gender</b>                     |        |           |                                                      |              |                              |         |
| Female                            | 5      | 2         | 53 (5-100)                                           |              | 1.00                         |         |
| Male                              | 11     | 8         | 20 (0-45)                                            | 0.198        | 2.67 (0.56-12.66)            | 0.215   |
| <b>Metastases at diagnosis</b>    |        |           |                                                      |              |                              |         |
| No                                | 0      | -         | -                                                    |              | 1.00                         |         |
| Yes                               | 15     | 9         | 30 (6-54)                                            | -            | -                            | -       |
| <b>Radical Surgery</b>            |        |           |                                                      |              |                              |         |
| No                                | 1      | 1         | 0                                                    |              | 1.00                         |         |
| Yes                               | 15     | 9         | 32 (7-58)                                            | 0.308        | 0.34 (0.04-3.02)             | 0.331   |
| <b>Ki67 (%)</b>                   |        |           |                                                      |              |                              |         |
| <3                                | 11     | 6         | 35 (4-66)                                            |              | 1.00                         |         |
| 3-20                              | 5      | 4         | 20 (0-55)                                            |              | 1.65 (0.46-5.94)             |         |
| >20                               | 0      | -         | -                                                    | 0.438        | -                            | 0.442   |
| <b>SSA Receptors<sup>11</sup></b> |        |           |                                                      |              |                              |         |
| No                                | 8      | 5         | 29 (0-62)                                            |              | 1.00                         |         |
| Yes                               | 8      | 5         | 33 (0-69)                                            | 0.870        | 1.11 (0.32-3.86)             | 0.870   |
| <b>PET-FDG<sup>12</sup></b>       |        |           |                                                      |              |                              |         |
| No                                | 10     | 8         | 13 (0-37)                                            |              | 1.00                         |         |
| Yes                               | 3      | 0         | 100                                                  | <b>0.029</b> | ne                           | -       |
| <b>% hERG1 positive cells</b>     |        |           |                                                      |              |                              |         |
| Negative (<40)                    | 2      | 0         | 100                                                  |              | 1.00                         |         |
| Positive (≥40)                    | 14     | 10        | 23 (0-46)                                            | 0.164        | ne                           | -       |

<sup>8</sup> PFS: Progression Free Survival.

<sup>9</sup> HR: Hazard Ratio.

<sup>10</sup> CI: Confidence Interval

<sup>11</sup> SSA Receptors: somatostatin analogs receptors.

<sup>12</sup> PET-FDG: fluorodeoxyglucose (FDG)-positron emission tomography (PET).

**Table S4.** Univariate analysis of Progression Free Survival in TNM IV ileal NET patients.

|                                   | N. pts | N. events | Median PFS <sup>13</sup><br>(months)<br>(95% CI <sup>14</sup> ) | P (logrank) | HR <sup>15</sup><br>(95% CI) | P (Cox) |
|-----------------------------------|--------|-----------|-----------------------------------------------------------------|-------------|------------------------------|---------|
| <b>Overall</b>                    | 15     | 14        | 6 (3-9)                                                         | -           | -                            | -       |
| <b>Age</b> (continuous variable)  | 15     | 14        | -                                                               | -           | 0.977 (0.933-1.023)          | 0.327   |
| <70                               | 12     | 12        | 6 (3-13)                                                        |             | 1.00                         |         |
| ≥70                               | 3      | 2         | 6 (2-nr)                                                        | 0.441       | 0.55 (0.12-2.54)             | 0.446   |
| <b>Gender</b>                     |        |           |                                                                 |             |                              |         |
| Female                            | 11     | 10        | 7 (3-16)                                                        |             | 1.00                         |         |
| Male                              | 4      | 4         | 3 (0-nr)                                                        | 0.187       | 2.22 (0.66-7.53)             | 0.199   |
| <b>Metastases at diagnosis</b>    |        |           |                                                                 |             |                              |         |
| No                                | 0      | -         | -                                                               |             | 1.00                         |         |
| Yes                               | 15     | 14        | 6 (3-9)                                                         | -           | ne                           | -       |
| <b>Radical Surgery</b>            |        |           |                                                                 |             |                              |         |
| No                                | 12     | 11        | 6 (2-16)                                                        |             | 1.00                         |         |
| Yes                               | 3      | 3         | 5 (3-nr)                                                        | 0.332       | 1.94 (0.50-7.61)             | 0.340   |
| <b>Ki67 (%)</b>                   |        |           |                                                                 |             |                              |         |
| <3                                | 4      | 3         | 12 (5-nr) <sup>2</sup>                                          |             | 1.00                         |         |
| 3-20                              | 9      | 9         | 3 (0-9)                                                         |             | 2.66 (0.70-10.05)            |         |
| >20                               | 2      | 2         | 9 (5-nr)                                                        | 0.323       | 1.81 (0.29-11.26)            | 0.347   |
| <b>SSA Receptors<sup>16</sup></b> |        |           |                                                                 |             |                              |         |
| No                                | 3      | 3         | 5 (2-nr)                                                        |             | 1.00                         |         |
| Yes                               | 12     | 11        | 7 (3-16)                                                        | 0.077       | 0.28 (0.06-1.26)             | 0.098   |
| <b>PET-FDG<sup>17</sup></b>       |        |           |                                                                 |             |                              |         |
| No                                | 10     | 9         | 6 (0-13)                                                        |             | 1.00                         |         |
| Yes                               | 3      | 3         | 3 (3-nr)                                                        | 0.217       | 2.42 (0.57-10.30)            | 0.231   |
| <b>% hERG1 positive cells</b>     |        |           |                                                                 |             |                              |         |
| Negative (<40)                    | 5      | 5         | 9 (3-nr)                                                        |             | 1.00                         |         |
| Positive (≥40)                    | 10     | 9         | 5 (0-8)                                                         | 0.765       | 1.19 (0.38-3.68)             | 0.765   |

<sup>13</sup> PFS: Progression Free Survival.

<sup>14</sup> HR: Hazard Ratio.

<sup>15</sup> CI: Confidence Interval

<sup>16</sup> SSA Receptors: somatostatin analogs receptors.

<sup>17</sup> PET-FDG: fluorodeoxyglucose (FDG)-positron emission tomography (PET).

**Figure S2.** Kaplan-Meier plots of PFS in ileal NET patients according to hERG1 expression (cut-off: 40%). Blue curves: hERG1 negative samples (<40%), Red curves: hERG1 positive samples ( $\geq 40\%$ ).

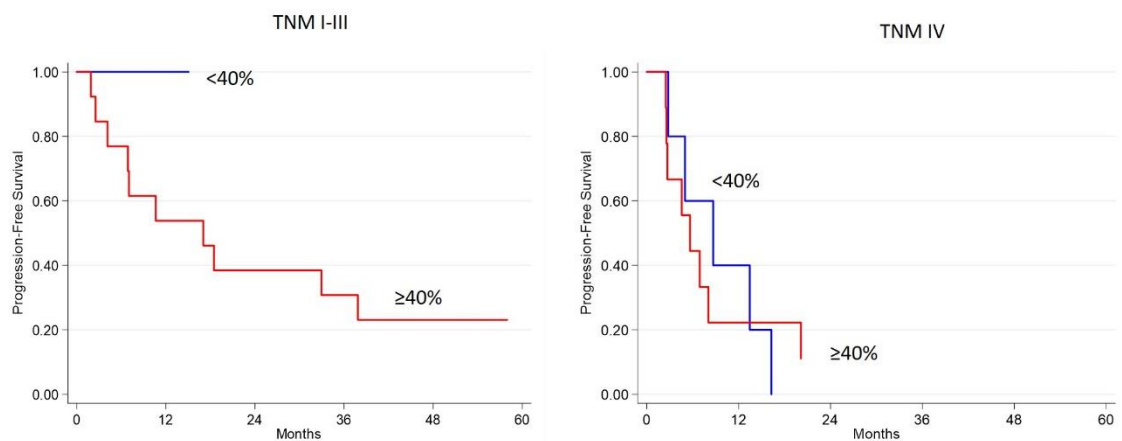

**Table S5. Univariate analysis of Progression Free Survival in TNM I-III pancreatic NET patients. Statistically significant values are reported in bold.**

|                                   | N. pts | N. events | % 5-years PFS <sup>18</sup><br>(95% CI <sup>19</sup> ) | P (logrank)       | HR <sup>20</sup><br>(95% CI) | P (Cox) |
|-----------------------------------|--------|-----------|--------------------------------------------------------|-------------------|------------------------------|---------|
| <b>Overall</b>                    | 40     | 9         | 76 (63-90)                                             | -                 | -                            | -       |
| <b>Age</b> (continuous variable)  |        |           |                                                        |                   |                              |         |
| <70                               | 30     | 8         | 71 (55-88)                                             |                   | 1.00                         |         |
| ≥70                               | 10     | 1         | 90 (71-100)                                            | 0.240             | 0.31 (0.04-2.46)             | 0.267   |
| <b>Gender</b>                     |        |           |                                                        |                   |                              |         |
| Female                            | 22     | 4         | 82 (65-98)                                             |                   | 1.00                         |         |
| Male                              | 18     | 5         | 69 (47-92)                                             | 0.500             | 1.57 (0.42-5.84)             | 0.503   |
| <b>Metastases at diagnosis</b>    |        |           |                                                        |                   |                              |         |
| No                                | 40     | 9         | 76 (63-90)                                             |                   | 1.00                         |         |
| Yes                               | 0      | -         | -                                                      | -                 | ne                           | -       |
| <b>Radical Surgery</b>            |        |           |                                                        |                   |                              |         |
| No                                | 0      | -         | -                                                      |                   | 1.00                         |         |
| Yes                               | 40     | 9         | 76 (63-90)                                             | -                 | ne                           | -       |
| <b>Ki67 (%)</b>                   |        |           |                                                        |                   |                              |         |
| <3                                | 26     | 3         | 88 (76-100)                                            |                   | 1.00                         |         |
| 3-20                              | 13     | 5         | 55 (26-85)                                             |                   | ne                           |         |
| >20                               | 1      | 1         | 0                                                      | <b>&lt;0.0001</b> | ne                           | -       |
| <b>SSA Receptors<sup>21</sup></b> |        |           |                                                        |                   |                              |         |
| No                                | 0      | -         | -                                                      |                   | 1.00                         |         |
| Yes                               | 10     | 6         | 27 (0-59)                                              | -                 | ne                           | -       |
| <b>PET-FDG<sup>22</sup></b>       |        |           |                                                        |                   |                              |         |
| No                                | 3      | 1         | 67 (13-100)                                            |                   | 1.00                         |         |
| Yes                               | 4      | 2         | 50 (1-99)                                              | 0.829             | 1.31 (0.11-15.21)            | 0.829   |
| <b>% hERG1 positive cells</b>     |        |           |                                                        |                   |                              |         |
| Negative (<40)                    | 25     | 6         | 73 (55-92)                                             |                   | 1.00                         |         |
| Positive (≥40)                    | 15     | 3         | 80 (60-100)                                            | 0.734             | 0.79 (0.20-3.15)             | 0.734   |

<sup>18</sup> PFS: Progression Free Survival.

<sup>19</sup> HR: Hazard Ratio.

<sup>20</sup> CI: Confidence Interval

<sup>21</sup> SSA Receptors: somatostatin analogs receptors.

<sup>22</sup> PET-FDG: fluorodeoxyglucose (FDG)-positron emission tomography (PET).



**Table S6.** Univariate analysis of Progression Free Survival in TNM IV pancreatic NET patients. Statistically significant values are reported in bold.

|                                   | N. pts | N. events | Median PFS <sup>23</sup><br>(months)<br>(95% CI <sup>24</sup> ) | P (logrank)   | HR <sup>25</sup><br>(95% CI) | P (Cox)      |
|-----------------------------------|--------|-----------|-----------------------------------------------------------------|---------------|------------------------------|--------------|
| <b>Overall</b>                    | 19     | 16        | 9 (4-31)                                                        | -             | -                            | -            |
| <b>Age</b> (continuous variable)  |        |           |                                                                 |               |                              |              |
| <70                               | 16     | 14        | 8 (4-31)                                                        |               | 1.00                         |              |
| ≥70                               | 3      | 2         | 10 (2-nr)                                                       | 0.821         | 0.84 (0.19-3.77)             | 0.822        |
| <b>Gender</b>                     |        |           |                                                                 |               |                              |              |
| Female                            | 7      | 5         | 74 (2-nr)                                                       |               | 1.00                         |              |
| Male                              | 12     | 11        | 8 (2-22)                                                        | 0.150         | 2.32 (0.71-7.57)             | 0.162        |
| <b>Metastases at diagnosis</b>    |        |           |                                                                 |               |                              |              |
| No                                | 0      | -         | -                                                               |               | 1.00                         |              |
| Yes                               | 19     | 16        | 9 (4-31)                                                        | -             | ne                           | -            |
| <b>Radical Surgery</b>            |        |           |                                                                 |               |                              |              |
| No                                | 17     | 14        | 8 (2-74)                                                        |               | 1.00                         |              |
| Yes                               | 2      | 2         | 16 (10-nr)                                                      | 0.855         | 1.15 (0.25-5.30)             | 0.856        |
| <b>Ki67 (%)</b>                   |        |           |                                                                 |               |                              |              |
| <3                                | 5      | 5         | 22 (5-nr)                                                       |               | 1.00                         |              |
| 3-20                              | 8      | 5         | 20 (2-nr)                                                       |               | 0.95 (0.25-3.56)             |              |
| >20                               | 6      | 6         | 4 (1-nr)                                                        | <b>0.018</b>  | 4.72 (1.13-19.66)            | <b>0.038</b> |
| <b>SSA Receptors<sup>26</sup></b> |        |           |                                                                 |               |                              |              |
| No                                | 1      | 1         | 2 (-)                                                           |               | 1.00                         |              |
| Yes                               | 11     | 9         | 22 (5-74)                                                       | <b>0.0009</b> | ne                           | -            |
| <b>PET-FDG<sup>27</sup></b>       |        |           |                                                                 |               |                              |              |
| No                                | 5      | 3         | 31 (8-nr)                                                       |               | 1.00                         |              |
| Yes                               | 8      | 8         | 5 (2-10)                                                        | 0.043         | 3.77 (0.95-14.90)            | 0.058        |
| <b>% hERG1 positive cells</b>     |        |           |                                                                 |               |                              |              |
| Negative (<40)                    | 16     | 14        | 10 (5-31)                                                       |               | 1.00                         |              |
| Positive (≥40)                    | 3      | 2         | 4 (1-nr)                                                        | 0.910         | 1.09 (0.24-4.90)             | 0.909        |

<sup>23</sup> PFS: Progression Free Survival.

<sup>24</sup> HR: Hazard Ratio.

<sup>25</sup> CI: Confidence Interval

<sup>26</sup> SSA Receptors: somatostatin analogs receptors

<sup>27</sup> PET-FDG: fluorodeoxyglucose (FDG)-positron emission tomography (PET).

**Figure S3.** Kaplan-Meier plots of PFS in pancreatic NET patients according to hERG1 expression (cut-off: 40%) in TNM I-III (left) and TNM IV patients (right). Blue curves: hERG1 negative samples (<40%), Red curves: hERG1 positive samples ( $\geq 40\%$ ).

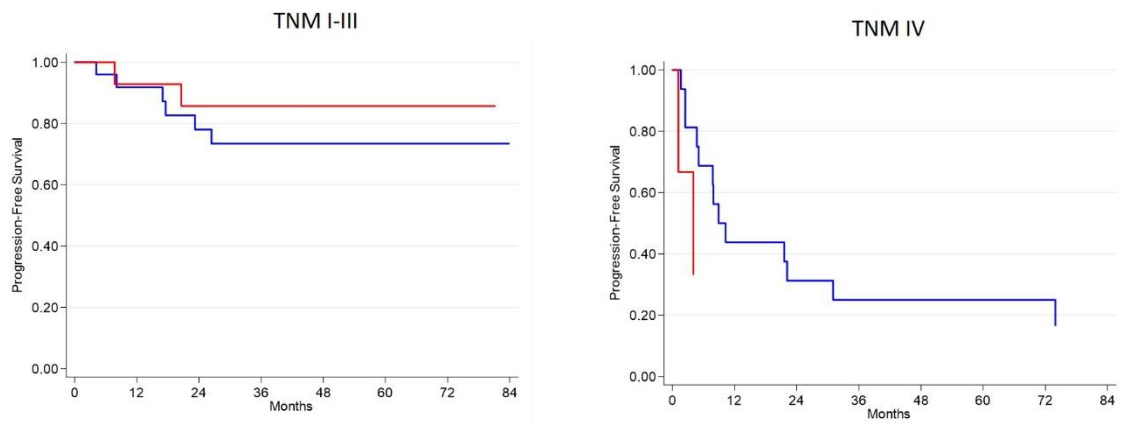

**Table S7.** *P* values of the comparison between control and E4031- treated INS 1E.

|                                     | <b>P value</b> |         |
|-------------------------------------|----------------|---------|
| <b>CTR vs 0.1 <math>\mu</math>M</b> | 24h            | 0.002   |
|                                     | 48h            | 0.040   |
|                                     | 72h            | 0.020   |
|                                     | 96h            | 0.004   |
| <b>CTR vs 1 <math>\mu</math>M</b>   | 24h            | 0.013   |
|                                     | 48h            | 0.030   |
|                                     | 72h            | < 0.001 |
|                                     | 96h            | < 0.001 |
| <b>CTR vs 10 <math>\mu</math>M</b>  | 24h            | 0.004   |
|                                     | 48h            | 0.010   |
|                                     | 72h            | < 0.001 |
|                                     | 96h            | < 0.001 |
| <b>CTR vs 25 <math>\mu</math>M</b>  | 24h            | 0.002   |
|                                     | 48h            | 0.011   |
|                                     | 72h            | 0.001   |
|                                     | 96h            | < 0.001 |
| <b>CTR vs 50 <math>\mu</math>M</b>  | 24h            | < 0.001 |
|                                     | 48h            | 0.007   |
|                                     | 72h            | < 0.001 |
|                                     | 96h            | < 0.001 |
| <b>CTR vs 100 <math>\mu</math>M</b> | 24h            | 0.001   |
|                                     | 48h            | 0.006   |
|                                     | 72h            | < 0.001 |
|                                     | 96h            | < 0.001 |
| <b>CTR vs 200 <math>\mu</math>M</b> | 24h            | 0.002   |
|                                     | 48h            | 0.001   |
|                                     | 72h            | < 0.001 |
|                                     | 96h            | < 0.001 |
